# Supplementary material
Source: publisher figshare collection journal article supplement (https://gsajournals.figshare.com/articles/dataset/_/6193055)
Supplement: Supplementary file 1 [file 1]

## Sheet: Index
INDEX	Title
Supplementary Table 1	S1: Validation of the significant and novel genes identified by analyzing the SCZ1 data.
Supplementary Table 2	S2: The significant and novel genes identified by different methods with the SCZ1 data
Supplementary Table 3	S3: The significant and novel genes identified by our new method applied to "enhancer + gene body" regions with the SCZ2 data
Supplementary Table 4	S4: The significant and novel genes identified by our new method applied to "enhancer only" regions with the SCZ2 data
Supplementary Table 5	S5: The significant and novel genes identified by TWAS with the SCZ2 data
Supplementary Table 6	S6: The significant and novel genes identified by STD with the SCZ2 data
Supplementary Table 7	S7:﻿The numbers of the significant genes identified by analyzing the SCZ1 data
Supplementary Table 8	﻿S8:The numbers of the significant genes identified by analyzing the SCZ2 data
Supplementary Table 9	S9: The significant and novel genes identified by our new method applied to "enhancer + gene body" regions with CP or GZ information but no identified by ``E+G" or ``E" with MCF7 or Hippo information, TWAS, or STD in the SCZ2 data

## Sheet: Supplementary Table 1
S1: Validation of the significant and novel genes identified by analyzing the SCZ1 data												Back to Index
	Ehancer		Enhancer + Gene body		Gene body	TWAS
	MCF7	Hippo	MCF7	Hippo		YFS	NTR	METSIM	CMC
SPU(1)	0;1	0;1	1;5.7E-02	1;4.5E-03	1;1.4E-05	1;9.1E-04	1;4.9E-05	0.67; 1.8E-02	0.67; 6.5E-04
SPU(2)	0.6;5.5E-06	0;1	0.6;5.9E-06	0.67;1.5E-07	0.83;3.9E-11	0.5;1.4E-02	1;2.3E-09	1;1.5E-10	0.79;4.1E-10
Remark: The numbers a;b in each cell indicate (a) the proportion of signigicant and novel genes validated by the SCZ2 data; (b) the p value of hypergeometric test

## Sheet: Supplementary Table 2
S2: The significant and novel genes identified by different methods with the SCZ1 data												Back to Index
Gene	CHR	P0	P1	SPU(1)	SPU(2)	most sig. SNP in SCZ1	most sig. SNP in SCZ2	Source	Method	Reported
VPS45	1	150038841	150118005	2.19517e-05	6.1954e-07	1.728e-06	9.337e-10	MCF7	E only	www.ncbi.nlm.nih.gov/pubmed/25056061
PLEKHO1	1	150121266	150132341	0.00157578	2.2066e-07	1.728e-06	9.337e-10	MCF7	E only	www.ncbi.nlm.nih.gov/pubmed/25056061
ANKRD44	2	197831240	198176021	0.000387875	1.17819e-06	9.99e-07	1.478e-11	MCF7	E only	www.ncbi.nlm.nih.gov/pubmed/25056061		Remark:
COQ10B	2	198317730	198340351	3.3758e-05	1.70825e-06	9.99e-07	1.478e-11	MCF7	E only	www.ncbi.nlm.nih.gov/pubmed/25056061		1. Apply Bonferroni correction for each method
OSBPL10	3	31698902	32023842	2.20289e-06	3.16121e-06	3.406e-07	1.085e-05	MCF7	E only			2. Reported column is based on the GWAS Catalog v1.0
ZNF860	3	32022765	32033728	2.20289e-06	3.16121e-06	3.406e-07	1.085e-05	MCF7	E only	www.ncbi.nlm.nih.gov/pubmed/26198764
CLCN3	4	170541171	170644838	3.17733e-05	1.62934e-07	6.181e-07	1.02e-08	MCF7	E only	www.ncbi.nlm.nih.gov/pubmed/25056061
CDK2AP1	12	123745016	123757363	0.00028313	2.43828e-06	1.371e-06	2.189e-14	MCF7	E only	www.ncbi.nlm.nih.gov/pubmed/23974872
NMRAL1	16	4511194	4525396	0.00366073	2.23073e-06	4.532e-07	2.792e-07	MCF7	E only	www.ncbi.nlm.nih.gov/pubmed/28991256
HMOX2	16	4524218	4560848	0.00366073	2.23073e-06	4.532e-07	2.792e-07	MCF7	E only
CORO7-PAM16	8	4389751	4467462	1.37301e-05	1.79744e-05	4.532e-07	2.792e-07	Hippo	E only	www.ncbi.nlm.nih.gov/pubmed/28991256
VASN	8	4421348	4434029	1.37301e-05	1.79744e-05	4.532e-07	2.792e-07	Hippo	E only
PLEKHO1	1	150121266	150132341	0.000182312	4.8371e-07	1.728e-06	9.337e-10	MCF7	E+G	www.ncbi.nlm.nih.gov/pubmed/25056061
MBD5	2	148778079	149271544	3.1593e-06	7.57899e-05	4.839e-06	2.621e-08	MCF7	E+G
COQ10B	2	198317730	198340351	0.000416183	1.3543e-06	9.99e-07	1.478e-11	MCF7	E+G	www.ncbi.nlm.nih.gov/pubmed/25056061
CLCN3	4	170541171	170644838	0.00204263	1.15016e-06	6.181e-07	1.02e-08	MCF7	E+G	www.ncbi.nlm.nih.gov/pubmed/25056061
CACNB2	10	18429105	18831188	0.615563	2.76376e-06	3.864e-07	3.562e-11	MCF7	E+G	www.ncbi.nlm.nih.gov/pubmed/23974872
ZNF365	10	64018415	64432271	0.766909	2.01099e-09	8.154e-06	5.978e-08	MCF7	E+G	www.ncbi.nlm.nih.gov/pubmed/26198764
PITPNM2	12	123467526	123635785	0.000386592	1.18117e-06	1.371e-06	2.189e-14	MCF7	E+G	www.ncbi.nlm.nih.gov/pubmed/23974872
CDK2AP1	12	123745016	123757363	0.00028313	2.43828e-06	1.371e-06	2.189e-14	MCF7	E+G	www.ncbi.nlm.nih.gov/pubmed/23974872
DNAJA3	16	4475305	4507275	8.31319e-05	3.56299e-07	4.532e-07	2.792e-07	MCF7	E+G	www.ncbi.nlm.nih.gov/pubmed/26198764
NMRAL1	16	4511194	4525396	0.00212171	4.08948e-06	4.532e-07	2.792e-07	MCF7	E+G	www.ncbi.nlm.nih.gov/pubmed/28991256
HMOX2	16	4524218	4560848	0.00285464	4.31778e-06	4.532e-07	2.792e-07	MCF7	E+G
PLEKHO1	1	150121669	150132325	0.0452209	1.70126e-06	1.728e-06	9.337e-10	Hippo	E+G	www.ncbi.nlm.nih.gov/pubmed/25056061
CACNB2	2	18429105	18831188	0.587709	2.65657e-06	3.864e-07	3.562e-11	Hippo	E+G	www.ncbi.nlm.nih.gov/pubmed/23974872
ZNF365	2	64133415	64432271	0.459166	3.94565e-08	8.154e-06	5.978e-08	Hippo	E+G	www.ncbi.nlm.nih.gov/pubmed/26198764
CTNND1	3	57528733	57587152	0.0185182	9.26854e-06	1.564e-05	6.652e-08	Hippo	E+G	www.ncbi.nlm.nih.gov/pubmed/25056061
C12orf65	4	123717343	123743006	0.00227344	8.35755e-06	1.371e-06	2.189e-14	Hippo	E+G	www.ncbi.nlm.nih.gov/pubmed/23974872
MPHOSPH9	4	123640442	123718285	8.7026e-05	6.72536e-06	1.371e-06	2.189e-14	Hippo	E+G	www.ncbi.nlm.nih.gov/pubmed/23974872
MAPK3	8	30124925	30135130	7.79181e-06	6.31836e-05	1.085e-05	1.298e-10	Hippo	E+G	www.ncbi.nlm.nih.gov/pubmed/25056061
NMRAL1	8	4511194	4525396	0.00203735	4.06826e-06	4.532e-07	2.792e-07	Hippo	E+G	www.ncbi.nlm.nih.gov/pubmed/28991256
CILP2	11	19648573	19657968	1.16115e-05	5.82005e-06	5.382e-07	6.921e-09	Hippo	E+G	www.ncbi.nlm.nih.gov/pubmed/23974872
MAU2	11	19431129	19470063	0.000238989	1.04937e-05	5.382e-07	6.921e-09	Hippo	E+G	www.ncbi.nlm.nih.gov/pubmed/23974872
NDUFA13	11	19626518	19639513	1.55332e-05	9.27083e-06	5.382e-07	6.921e-09	Hippo	E+G	www.ncbi.nlm.nih.gov/pubmed/23974872
PPP1R21	12	48667407	48743031	0.163786	5.41756e-06	1.681e-06	1.662e-06	Hippo	E+G
ATXN7	16	63849732	63989636	2.36285e-05	1.91273e-06	1.81e-06	2.584e-08	Hippo	E+G	www.ncbi.nlm.nih.gov/pubmed/25056061
PSMD6	16	63995724	64010186	8.50742e-07	1.92066e-05	1.81e-06	2.584e-08	Hippo	E+G	www.ncbi.nlm.nih.gov/pubmed/25056061
BC041341	1	73771352	73805060	4.69734e-07	3.88599e-07	4.676e-07	2.346e-10		STD
PLEKHO1	1	150121266	150132341	0.00360156	7.19372e-07	1.728e-06	9.337e-10		STD	www.ncbi.nlm.nih.gov/pubmed/25056061
ITIH3	3	52828283	52843525	1.44215e-06	6.64394e-07	9.31e-07	3.956e-11		STD	www.ncbi.nlm.nih.gov/pubmed/21926974
ATXN7	3	63849732	63989636	2.73157e-05	1.71428e-06	1.81e-06	2.584e-08		STD	www.ncbi.nlm.nih.gov/pubmed/25056061
PSMD6-AS2	3	63989197	63998417	2.11337e-06	9.98221e-06	1.81e-06	2.584e-08		STD
SOX2-OT	3	180773967	181460513	0.00124117	8.41847e-07	3.56e-07	5.349e-11		STD	www.ncbi.nlm.nih.gov/pubmed/25056061
CLCN3	4	170541171	170644838	0.0125859	1.35669e-06	6.181e-07	1.02e-08		STD	www.ncbi.nlm.nih.gov/pubmed/25056061
ZNF365	10	64018415	64432271	0.776129	1.93068e-09	8.154e-06	5.978e-08		STD	www.ncbi.nlm.nih.gov/pubmed/26198764
PITPNM2	12	123467526	123635785	0.000428012	1.31939e-06	1.371e-06	2.189e-14		STD	www.ncbi.nlm.nih.gov/pubmed/23974872
GOLGA6L5	15	85047237	85060578	0.000649262	5.69893e-08	3.131e-06	7.62e-11		STD
DNAJA3	16	4475305	4507275	6.20471e-05	2.23184e-07	4.532e-07	2.792e-07		STD	www.ncbi.nlm.nih.gov/pubmed/26198764
CILP2	19	19648573	19657968	9.6301e-07	1.13761e-06	5.382e-07	6.921e-09		STD	www.ncbi.nlm.nih.gov/pubmed/23974872
MKL1	22	40805791	41033190	1.24479e-05	6.02205e-07	3.045e-07	9.728e-10		STD	www.ncbi.nlm.nih.gov/pubmed/26198764
CNN3	1	95362507	95392834	0.00410446	4.35443e-06	8.559e-07	9.386e-07	YFS	TWAS
PRPF3	1	150293925	150325671	0.000466799	6.31259e-06	1.728e-06	9.337e-10	YFS	TWAS
HEATR5B	2	37195526	37311485	0.00972782	6.85994e-08	1.453e-06	2.631e-06	YFS	TWAS
BAG5	14	104022881	104029168	0.00028765	2.23597e-06	5.602e-07	1.172e-13	YFS	TWAS	www.ncbi.nlm.nih.gov/pubmed/25056061
GATAD2A	19	19496639	19619740	3.09919e-06	1.83236e-06	5.382e-07	6.921e-09	YFS	TWAS	www.ncbi.nlm.nih.gov/pubmed/23974872
SDCBP2	20	1290619	1309883	0.000315843	6.5141e-06	1.087e-07	1.335e-05	YFS	TWAS
ANKRD44	2	197831741	198175897	6.86522e-06	0.000545069	9.99e-07	1.478e-11	YFS	TWAS	www.ncbi.nlm.nih.gov/pubmed/25056061
GNL3	3	52715172	52728508	8.94886e-06	1.18435e-05	9.31e-07	3.956e-11	YFS	TWAS	www.ncbi.nlm.nih.gov/pubmed/23974872
ANP32E	1	150190716	150208513	5.89325e-05	2.88879e-06	1.728e-06	9.337e-10	NTR	TWAS	www.ncbi.nlm.nih.gov/pubmed/25056061
WDR82	3	52288282	52312659	2.04951e-05	5.12897e-06	6.028e-06	1.179e-10	NTR	TWAS	www.ncbi.nlm.nih.gov/pubmed/23974872
ITIH4	3	52847006	52867741	9.24827e-06	1.54028e-05	9.31e-07	3.956e-11	NTR	TWAS	www.ncbi.nlm.nih.gov/pubmed/21926974
NEK1	4	170314420	170533614	1.38737e-07	8.72994e-08	6.181e-07	1.02e-08	NTR	TWAS	www.ncbi.nlm.nih.gov/pubmed/25056061
CLCN3	4	170541668	170644820	6.61303e-06	1.8102e-06	6.181e-07	1.02e-08	NTR	TWAS	www.ncbi.nlm.nih.gov/pubmed/25056061
KLC1	14	104029298	104167881	0.000543796	1.9461e-05	5.602e-07	1.172e-13	NTR	TWAS	www.ncbi.nlm.nih.gov/pubmed/25056061
GATAD2A	19	19496641	19619736	2.92159e-05	1.31989e-06	5.382e-07	6.921e-09	NTR	TWAS	www.ncbi.nlm.nih.gov/pubmed/23974872
EP300	22	41487772	41576074	0.106661	2.03336e-06	3.045e-07	6.763e-12	NTR	TWAS	www.ncbi.nlm.nih.gov/pubmed/25056061
ANKRD44	2	197859249	198175521	5.6739e-06	0.001711	9.99e-07	1.478e-11	NTR	TWAS	www.ncbi.nlm.nih.gov/pubmed/25056061
RERE	1	8412457	8877702	7.43669e-06	7.67164e-06	5.39e-07	2.025e-09	METSIM	TWAS	www.ncbi.nlm.nih.gov/pubmed/21926974
ITIH4	3	52846991	52865495	2.77971e-05	5.19183e-06	9.31e-07	3.956e-11	METSIM	TWAS	www.ncbi.nlm.nih.gov/pubmed/21926974
NISCH	3	52489134	52527087	0.194572	1.06309e-05	9.31e-07	3.956e-11	METSIM	TWAS	www.ncbi.nlm.nih.gov/pubmed/23974872
ERCC8	5	60169658	60240900	1.90506e-05	5.07222e-06	1.624e-06	1.734e-13	METSIM	TWAS	www.ncbi.nlm.nih.gov/pubmed/26198764
CDK2AP1	12	123745528	123756881	6.31933e-05	2.69165e-06	1.371e-06	2.189e-14	METSIM	TWAS	www.ncbi.nlm.nih.gov/pubmed/23974872
TDRD9	14	104394799	104519004	0.000714479	1.68687e-06	5.602e-07	1.172e-13	METSIM	TWAS	www.ncbi.nlm.nih.gov/pubmed/26198764
MARK3	14	103851729	103970168	2.66752e-06	2.21549e-06	5.602e-07	1.172e-13	METSIM	TWAS
XRCC3	14	104163946	104181841	5.03259e-05	3.10682e-06	5.602e-07	1.172e-13	METSIM	TWAS	www.ncbi.nlm.nih.gov/pubmed/25056061
RP11-397A16.2	18	53443958	53448952	0.00116379	1.05576e-05	8.929e-07	9.091e-13	METSIM	TWAS
CDIP1	16	4560676	4588829	7.53438e-06	1.31241e-05	4.532e-07	2.792e-07	METSIM	TWAS	www.ncbi.nlm.nih.gov/pubmed/28991256
CEBPZ	2	37428774	37458740	0.494531	6.46579e-06	1.453e-06	2.631e-06	CMC	TWAS	www.ncbi.nlm.nih.gov/pubmed/23974872
PBRM1	3	52579367	52719866	0.0375267	6.48463e-06	9.31e-07	3.956e-11	CMC	TWAS	www.ncbi.nlm.nih.gov/pubmed/23974872
ITIH4	3	52847005	52864717	4.90502e-05	6.69077e-06	9.31e-07	3.956e-11	CMC	TWAS	www.ncbi.nlm.nih.gov/pubmed/21926974
CLCN3	4	170541671	170644338	1.85047e-06	3.68071e-06	6.181e-07	1.02e-08	CMC	TWAS	www.ncbi.nlm.nih.gov/pubmed/25056061
IMMP2L	7	110303105	111202573	0.0102192	8.32001e-06	2.384e-06	6.162e-13	CMC	TWAS	www.ncbi.nlm.nih.gov/pubmed/25056061
TEK	9	27109146	27230172	2.74457e-06	1.36532e-06	3.517e-05	4.749e-07	CMC	TWAS	www.ncbi.nlm.nih.gov/pubmed/26198764
OPCML	11	132284874	133402403	0.173233	5.19091e-06	2.446e-06	1.232e-11	CMC	TWAS	www.ncbi.nlm.nih.gov/pubmed/26198764
RILPL1	12	123955908	124018265	0.0481904	3.66287e-07	1.371e-06	2.189e-14	CMC	TWAS
SETD8	12	123868703	123893900	0.00169507	3.57422e-06	1.371e-06	2.189e-14	CMC	TWAS	www.ncbi.nlm.nih.gov/pubmed/23974872
CORO7	16	4404542	4466962	3.18524e-06	2.94864e-06	4.532e-07	2.792e-07	CMC	TWAS	www.ncbi.nlm.nih.gov/pubmed/28991256
GATAD2A	19	19496641	19619741	2.05103e-06	1.86952e-06	5.382e-07	6.921e-09	CMC	TWAS	www.ncbi.nlm.nih.gov/pubmed/23974872
MAU2	19	19431629	19469563	0.000204362	4.31376e-06	5.382e-07	6.921e-09	CMC	TWAS	www.ncbi.nlm.nih.gov/pubmed/23974872
SLC25A17	22	41165638	41215392	8.84434e-06	1.42775e-06	3.045e-07	6.763e-12	CMC	TWAS	www.ncbi.nlm.nih.gov/pubmed/26198764
MCHR1	22	41075181	41078818	6.79452e-07	2.74951e-07	3.045e-07	9.728e-10	CMC	TWAS	www.ncbi.nlm.nih.gov/pubmed/26198764

## Sheet: Supplementary Table 3
S3: The significant and novel genes identified by our new method applied to "enhancer + gene body" regions with the SCZ2 data												Back to Index
Gene	CHR	P0	P1	# SNPs	SPU(1)	SPU(2)	sig. SNP	Source	Reported
ZBTB48	1	6640050	6649340	11	0.0637	3.67e-06	4.88e-06	HIP
JA611241	1	28567542	28567564	43	0.0454	1.51e-09	3.6e-06	MCF7			Remark:
FABP3	1	31838099	31845923	10	0.000831	3.31e-06	3.51e-06	HIP			1. p-value cutoff: 0.05/10000 = 5E-5
KLHL20	1	173684079	173755840	53	5.88e-06	3.92e-06	1.56e-05	MCF7			2. Reported column is based on the GWAS Catalog v1.0
GAS5-AS1	1	173832385	173833079	37	0.0313	1.02e-06	1.56e-05	MCF7
SNORD79	1	173834487	173834568	29	0.0102	4.93e-06	1.56e-05	MCF7
RBBP5	1	205055269	205091150	64	0.431	1.33e-07	8.69e-07	HIP
RBBP5	1	205055269	205091150	69	0.171	3.89e-08	8.69e-07	MCF7
DSTYK	1	205111630	205180727	147	1.23e-06	4.04e-06	8.69e-07	MCF7
mir-29b-2	1	207974866	207996048	30	0.00057	1.36e-06	1.61e-07	MCF7	www.ncbi.nlm.nih.gov/pubmed/26198764
MRPL33	2	27994583	28002608	15	0.00767	2.16e-06	1.01e-07	MCF7	www.ncbi.nlm.nih.gov/pubmed/26198764
RBKS	2	28004265	28113223	110	0.000469	2.47e-06	1.01e-07	MCF7
NDUFAF7	2	37458773	37476303	65	0.00125	4.9e-06	2.63e-06	MCF7
TRNA_Ile	2	43037675	43037768	76	0.122	0	0.000846	MCF7	www.ncbi.nlm.nih.gov/pubmed/26198764
ZNF365	2	64133915	64431771	580	0.284	5.11e-11	5.98e-08	HIP
DDX50	2	70661033	70706603	66	0.169	1.94e-06	6.56e-06	HIP
SFXN5	2	73169164	73298965	165	0.0311	1.63e-07	8.42e-08	MCF7	www.ncbi.nlm.nih.gov/pubmed/26198764
ALMS1	2	73612885	73837046	293	0.000186	1.52e-06	8.42e-08	MCF7
LOC285033	2	96874153	96908362	32	0.000754	5.06e-07	1.14e-05	MCF7
HAT1	2	172778934	172848600	78	0.00423	4.42e-06	1.87e-06	MCF7	www.ncbi.nlm.nih.gov/pubmed/26198764
FAM134A	2	220042938	220050197	28	4.41e-05	3.23e-06	9.51e-07	MCF7	www.ncbi.nlm.nih.gov/pubmed/25056061
YPEL4	3	57412559	57417417	7	0.00826	9.17e-07	6.65e-08	HIP	www.ncbi.nlm.nih.gov/pubmed/25056061
CLP1	3	57425215	57429337	8	0.457	3.08e-06	6.65e-08	HIP	www.ncbi.nlm.nih.gov/pubmed/25056061
MED19	3	57471186	57479673	15	0.521	2.83e-06	6.65e-08	HIP	www.ncbi.nlm.nih.gov/pubmed/25056061
TMX2	3	57479994	57508445	35	0.093	8.82e-07	6.65e-08	HIP	www.ncbi.nlm.nih.gov/pubmed/25056061
BTBD18	3	57510985	57519253	7	0.0162	2.64e-07	6.65e-08	HIP	www.ncbi.nlm.nih.gov/pubmed/25056061
CTNND1	3	57529233	57586652	45	0.00744	3.45e-09	6.65e-08	HIP
TRNA_His	3	148316562	148316634	73	0.000458	2.45e-12	0.000146	MCF7
UBE2D3	4	103717132	103790032	183	1.12e-06	1.45e-05	2.19e-06	MCF7
AK093356	4	103749290	103765255	87	1.29e-07	1.81e-05	2.19e-06	MCF7	www.ncbi.nlm.nih.gov/pubmed/26198764
NOS1	4	117645946	117799607	304	3.21e-06	1.99e-06	1.24e-06	HIP	www.ncbi.nlm.nih.gov/pubmed/26198764
ZNF664	4	124457761	124499986	54	2.83e-05	1.83e-06	4.07e-07	HIP	www.ncbi.nlm.nih.gov/pubmed/26198764
EMB	5	49692030	49737234	67	0.00136	1.16e-06	3.69e-07	MCF7
NDFIP2	5	80055258	80130212	70	0.205	1.23e-06	3.77e-06	HIP	www.ncbi.nlm.nih.gov/pubmed/25056061
MAN2A1	5	109025155	109203429	404	0.128	1.94e-06	1.03e-07	MCF7	www.ncbi.nlm.nih.gov/pubmed/28991256
NDUFA2	5	140024947	140027370	11	0.000222	1.43e-06	3.6e-07	MCF7
IK	5	140027383	140042065	27	8.17e-06	1.3e-06	3.6e-07	MCF7
SRP54	6	35452103	35498773	144	0.0218	3.96e-06	1.52e-07	HIP
CUL9	6	43149921	43192325	51	6.7e-05	3.78e-06	9.61e-07	MCF7	www.ncbi.nlm.nih.gov/pubmed/26198764
RTN1	6	60062693	60337557	375	0.798	1.62e-07	4.22e-07	HIP
GTF2A1	6	81641795	81687575	54	0.00312	9.99e-07	6.22e-06	HIP
SLC16A10	6	111408780	111544606	163	4.24e-08	9.72e-07	1.37e-06	MCF7	www.ncbi.nlm.nih.gov/pubmed/26198764
TRAF3IP2-AS1	6	111804674	111923497	214	1.1e-05	3.23e-07	1.37e-06	MCF7	www.ncbi.nlm.nih.gov/pubmed/26198764
DDX56	7	44605015	44614137	37	7.41e-08	9.79e-07	7.07e-07	MCF7	www.ncbi.nlm.nih.gov/pubmed/26198764
LIPC	7	58724174	58861073	309	0.000308	1.98e-06	5.19e-07	HIP	www.ncbi.nlm.nih.gov/pubmed/26198764
FAM63B	7	59063392	59149734	123	0.0321	1.45e-06	5.19e-07	HIP	www.ncbi.nlm.nih.gov/pubmed/26198764
RAB8B	7	63481727	63559973	92	0.000224	1.76e-06	4.09e-06	HIP	www.ncbi.nlm.nih.gov/pubmed/26198764
CPEB1	7	83211950	83316767	126	0.000582	1.88e-09	5.52e-08	HIP	www.ncbi.nlm.nih.gov/pubmed/28991256
AP3B2	7	83328032	83378660	58	0.694	1.18e-07	5.52e-08	HIP	www.ncbi.nlm.nih.gov/pubmed/21679298
MSRA	8	9911829	10286401	899	0.00307	2.25e-08	9.05e-08	MCF7
CNOT7	8	17086739	17104387	51	0.00654	2.67e-06	1.14e-07	MCF7	www.ncbi.nlm.nih.gov/pubmed/26198764
PSD3	8	18384812	18871196	1308	1.97e-06	1.04e-07	2.66e-07	MCF7
ASAP1-IT1	8	131307600	131308779	3	3.8e-06	0.000252	2.31e-06	MCF7
PUF60	8	144898513	144911556	50	8.73e-07	5.41e-08	1.83e-07	MCF7	www.ncbi.nlm.nih.gov/pubmed/26198764
ELAC2	9	12894928	12921381	125	0.00719	4.45e-06	2.84e-06	HIP
TRNA_His	9	14433937	14434009	73	0.00098	2.27e-12	4.3e-05	MCF7
B9D1	9	19240866	19281495	30	0.000115	6.04e-08	7.77e-07	HIP
MAPT	9	43971747	44105699	662	4.16e-13	6.36e-12	2.76e-05	HIP	www.ncbi.nlm.nih.gov/pubmed/26198764
RPTOR	9	78518624	78940173	1343	0.0706	5.64e-07	1.12e-06	HIP
DYM	10	46570171	46987079	759	3.16e-05	1.8e-06	2.5e-06	HIP	www.ncbi.nlm.nih.gov/pubmed/26198764
ZNF365	10	64018915	64431771	787	0.729	8.91e-12	5.98e-08	MCF7
GSTO1	10	106013951	106027222	11	2.77e-06	0.000399	6.2e-06	MCF7	www.ncbi.nlm.nih.gov/pubmed/25056061
CTNND1	11	57520714	57586652	58	0.104	1.55e-09	6.65e-08	MCF7
MACROD1	11	63766029	63933585	275	0.247	2.68e-06	1.31e-06	MCF7
MSGN1	12	17997785	17998367	6	1.73e-06	0.000131	1.87e-06	HIP
AGBL5	12	27274490	27293490	17	0.000384	3.84e-06	3.32e-05	HIP	www.ncbi.nlm.nih.gov/pubmed/26198764
CLIP1	12	122755980	122907116	221	0.0035	6.19e-07	3.82e-06	MCF7
KCNS1	13	43720949	43729753	22	0.818	1.03e-06	5.92e-06	HIP
NDFIP2	13	80055258	80130212	74	0.144	2.39e-06	3.77e-06	MCF7
TRNA_Arg	14	23398909	23398982	67	0.141	3.74e-06	9.37e-05	MCF7
PPP2R3C	14	35554677	35591679	133	0.543	3.13e-06	1.52e-07	MCF7	www.ncbi.nlm.nih.gov/pubmed/26198764
DOPEY2	14	37536838	37666572	370	0.014	1.9e-07	6.34e-06	HIP	www.ncbi.nlm.nih.gov/pubmed/26198764
PCNX	14	71374121	71582099	266	0.00115	1.96e-07	1.59e-07	MCF7
TRNA_Ile	14	102783428	102783502	78	0.0859	0	0.000183	MCF7
TRNA_His	15	45490803	45492682	76	0.00216	5.1e-12	0.00271	MCF7	www.ncbi.nlm.nih.gov/pubmed/26198764
ALG12	15	50296853	50312106	57	6.69e-05	2.46e-07	3.31e-07	HIP	www.ncbi.nlm.nih.gov/pubmed/26198764
FAM214A	15	52873517	52970953	225	0.000437	1.22e-06	1.06e-05	MCF7	www.ncbi.nlm.nih.gov/pubmed/26198764
RAB8B	15	63481727	63559973	99	6.58e-05	2.24e-06	4.09e-06	MCF7	www.ncbi.nlm.nih.gov/pubmed/26198764
CPEB1	15	83211950	83316728	128	4.23e-05	2.24e-09	5.52e-08	MCF7	www.ncbi.nlm.nih.gov/pubmed/26198764
DNAJA3	16	4475805	4506775	41	4.34e-06	5.85e-07	2.79e-07	MCF7	www.ncbi.nlm.nih.gov/pubmed/28991256
NMRAL1	16	4511694	4524896	37	0.000298	4.39e-06	2.79e-07	MCF7
HMOX2	16	4524718	4560348	53	0.000399	4.63e-06	2.79e-07	MCF7	www.ncbi.nlm.nih.gov/pubmed/26198764
SPG7	16	89574804	89624174	237	0.0993	5.22e-08	1.06e-07	MCF7
RPL13	16	89627064	89633237	105	0.0613	2.87e-09	1.06e-07	MCF7
SNORD68	16	89627837	89627909	98	0.000908	1.84e-08	1.06e-07	MCF7
DPEP1	16	89679715	89704839	87	0.00627	4.98e-06	1.06e-07	MCF7
C16orf55	16	89724151	89736866	45	0.178	1.37e-06	1.06e-07	MCF7
SPATA2L	16	89762764	89768121	50	0.428	3.04e-06	1.06e-07	MCF7
VPS9D1	16	89773540	89787394	107	0.00773	2.25e-06	1.06e-07	MCF7
ZNF276	16	89786807	89807332	167	0.00101	4.05e-06	1.06e-07	MCF7
TRNA_Ile	17	8090910	8090984	80	0.189	0	0.000134	MCF7	www.ncbi.nlm.nih.gov/pubmed/26198764
EPN2	17	19140689	19240028	55	1.2e-08	1.17e-08	7.77e-07	MCF7
CDK5R1	17	30814104	30818271	12	0.248	1.26e-06	3.27e-06	MCF7	www.ncbi.nlm.nih.gov/pubmed/26198764
RPTOR	17	78518624	78940173	1339	0.0776	9.18e-07	1.12e-06	MCF7
SLC4A9	18	139739786	139754722	9	0.00528	3.1e-06	3.6e-07	HIP
EIF4EBP3	18	139927250	139929163	6	0.00645	7.91e-07	3.6e-07	HIP	www.ncbi.nlm.nih.gov/pubmed/28991256
SRA1	18	139929651	139937678	9	5.83e-06	4.82e-06	3.6e-07	HIP
IK	18	140027383	140042065	23	0.00968	9.38e-08	3.6e-07	HIP
DND1	18	140050380	140053171	6	0.0476	8.62e-07	3.6e-07	HIP	www.ncbi.nlm.nih.gov/pubmed/28991256
ZMAT2	18	140080031	140086239	14	0.154	7.5e-07	3.6e-07	HIP
DIRAS1	19	2714564	2721390	23	1.62e-06	5.72e-08	1.09e-06	MCF7
TRNA_Ile	19	39902807	39902900	79	0.155	0	0.000186	MCF7	www.ncbi.nlm.nih.gov/pubmed/25056061
PRR12	19	50094911	50129696	37	2.02e-05	6.82e-07	2.19e-07	MCF7
IRF3	19	50162825	50169132	14	0.000227	1.07e-06	2.19e-07	MCF7
BCL2L12	19	50168398	50177173	15	1.56e-05	6.13e-07	2.19e-07	MCF7	www.ncbi.nlm.nih.gov/pubmed/26198764
MPP6	20	24613084	24727498	293	0.00123	4.6e-06	3.59e-07	HIP	www.ncbi.nlm.nih.gov/pubmed/26198764
STK4	20	43595119	43708593	154	0.0539	3.16e-06	5.92e-06	MCF7	www.ncbi.nlm.nih.gov/pubmed/25056061
KCNB1	20	47988504	48100490	206	1.52e-05	1.59e-06	1.18e-07	MCF7	www.ncbi.nlm.nih.gov/pubmed/21679298
MSRA	21	9911778	10286401	904	0.00399	1.94e-08	9.05e-08	HIP	www.ncbi.nlm.nih.gov/pubmed/26198764
DOPEY2	21	37536838	37666572	416	0.0588	1.06e-07	6.34e-06	MCF7	www.ncbi.nlm.nih.gov/pubmed/26198764
FAM120A	22	96213977	96328397	171	0.00538	2.45e-06	3.96e-06	HIP

## Sheet: Supplementary Table 4
S4: The significant and novel genes identified by our new method applied to "enhancer only" regions with the SCZ2 data												Back to Index
Gene	CHR	P0	P1	# SNPs	SPU(1)	SPU(2)	sig. SNP	Source	Reported
NOL9	1	6581406	6614658	2	0.64	2.84e-06	4.88e-06	HIP			Remark:
ZBTB48	1	6640050	6649340	5	0.309	4.93e-06	4.88e-06	HIP			1. p-value cutoff: 0.05/10000 = 5E-5
JA611241	1	28567542	28567564	39	0.0369	1.38e-09	3.6e-06	MCF7			2. Reported column is based on the GWAS Catalog v1.0
PSMB2	1	36035412	36107445	3	1	2.33e-06	1.22e-05	MCF7
NRAS	1	115247084	115259515	12	1.18e-06	0.000172	3.27e-06	MCF7
GAS5-AS1	1	173832385	173833079	33	0.102	1.38e-06	1.56e-05	MCF7
SNORD81	1	173833312	173833355	27	0.0102	4.93e-06	1.56e-05	MCF7
SNORD47	1	173833506	173833583	27	0.0102	4.93e-06	1.56e-05	MCF7
SNORD80	1	173833970	173834041	27	0.0102	4.93e-06	1.56e-05	MCF7
SNORD79	1	173834487	173834568	27	0.0102	4.93e-06	1.56e-05	MCF7
SNORD78	1	173834770	173834824	27	0.0102	4.93e-06	1.56e-05	MCF7
RBBP5	1	205055269	205091150	11	0.0446	1.04e-06	8.69e-07	MCF7
KLHDC8A	1	205305192	205326218	25	0.0388	1.51e-06	8.69e-07	HIP
MRPL33	2	27994583	28002608	10	0.00767	2.16e-06	1.01e-07	MCF7	www.ncbi.nlm.nih.gov/pubmed/26198764
TRNA_Ile	2	43037675	43037768	76	0.122	0	0.000846	MCF7
CCT7	2	73461363	73480150	14	0.0135	2.62e-06	8.42e-08	MCF7
ALMS1	2	73612885	73837046	6	9.44e-07	7.34e-07	8.42e-08	MCF7	www.ncbi.nlm.nih.gov/pubmed/26198764
STARD7	2	96850602	96874573	12	0.0152	3.91e-06	1.14e-05	MCF7
LOC285033	2	96874153	96908362	11	0.0127	3.02e-06	1.14e-05	MCF7
YPEL4	3	57412559	57417417	5	0.000113	2.63e-06	6.65e-08	HIP	www.ncbi.nlm.nih.gov/pubmed/25056061
CLP1	3	57425215	57429337	5	0.000113	2.63e-06	6.65e-08	HIP	www.ncbi.nlm.nih.gov/pubmed/25056061
MED19	3	57471186	57479673	5	0.000113	2.63e-06	6.65e-08	HIP	www.ncbi.nlm.nih.gov/pubmed/25056061
TMX2	3	57479994	57508445	2	2.18e-06	5.16e-07	6.65e-08	HIP	www.ncbi.nlm.nih.gov/pubmed/25056061
BTBD18	3	57510985	57519253	5	0.000113	2.63e-06	6.65e-08	HIP	www.ncbi.nlm.nih.gov/pubmed/25056061
CTNND1	3	57529233	57586652	5	0.000113	2.63e-06	6.65e-08	HIP	www.ncbi.nlm.nih.gov/pubmed/25056061
TRNA_His	3	148316562	148316634	71	0.000531	2.34e-12	0.000146	MCF7
SRP54	6	35452103	35498773	8	0.000327	2.46e-06	1.52e-07	HIP
GTF2A1	6	81641795	81687575	4	1.5e-06	1.84e-06	6.22e-06	HIP
REV3L	6	111620233	111804918	48	3.26e-07	1.03e-07	1.37e-06	MCF7
TRAF3IP2-AS1	6	111804674	111923497	48	3.26e-07	1.03e-07	1.37e-06	MCF7	www.ncbi.nlm.nih.gov/pubmed/26198764
DDX56	7	44605015	44614137	21	7.41e-08	9.79e-07	7.07e-07	MCF7	www.ncbi.nlm.nih.gov/pubmed/26198764
PDZD9	8	21995185	22012431	3	0.116	3.49e-06	1.19e-05	HIP
JA611241	8	67960635	67960655	39	0.0369	1.38e-09	7.44e-06	MCF7
DEF8	8	90015138	90034468	9	0.719	4.88e-06	1.06e-07	HIP
ASAP1-IT1	8	131307600	131308779	2	3.8e-06	0.000252	2.31e-06	MCF7
ZNF623	8	144718182	144735900	46	2.13e-05	3.51e-06	1.83e-07	MCF7
PUF60	8	144898513	144911556	32	4.01e-06	4.68e-07	1.83e-07	MCF7
TRNA_His	9	14433937	14434009	71	0.000531	2.34e-12	4.3e-05	MCF7
ZNF365	10	64018915	64431771	12	0.504	1.8e-06	5.98e-08	MCF7	www.ncbi.nlm.nih.gov/pubmed/26198764
GNG7	11	2511217	2702746	3	0.0127	3.03e-06	1.09e-06	HIP	www.ncbi.nlm.nih.gov/pubmed/26198764
CTNND1	11	57520714	57586652	10	9.26e-05	4.77e-07	6.65e-08	MCF7	www.ncbi.nlm.nih.gov/pubmed/25056061
SNORD81	12	54185088	54185131	27	0.0102	4.93e-06	2.69e-05	MCF7
PPP2R3C	14	35554677	35591679	27	0.475	1.47e-06	1.52e-07	MCF7
KIAA0391	14	35591526	35786682	27	0.475	1.47e-06	1.52e-07	MCF7	www.ncbi.nlm.nih.gov/pubmed/26198764
TRNA_Ile	14	102783428	102783502	76	0.122	0	0.000183	MCF7
TRNA_His	15	45490803	45492682	71	0.000531	2.34e-12	0.00271	MCF7
FAM214A	15	52873517	52970953	106	0.000164	4.83e-07	1.06e-05	MCF7	www.ncbi.nlm.nih.gov/pubmed/26198764
DNAJA3	16	4475805	4506775	4	8.82e-07	8.9e-07	2.79e-07	MCF7	www.ncbi.nlm.nih.gov/pubmed/26198764
NMRAL1	16	4511694	4524896	21	0.000318	2.21e-06	2.79e-07	MCF7	www.ncbi.nlm.nih.gov/pubmed/28991256
HMOX2	16	4524718	4560348	21	0.000318	2.21e-06	2.79e-07	MCF7
SPG7	16	89574804	89624174	107	0.65	2.63e-08	1.06e-07	MCF7	www.ncbi.nlm.nih.gov/pubmed/26198764
RPL13	16	89627064	89633237	88	0.000279	2.64e-08	1.06e-07	MCF7
SNORD68	16	89627837	89627909	94	6.24e-05	3.95e-08	1.06e-07	MCF7
CHMP1A	16	89710838	89724193	30	0.0014	1.68e-07	1.06e-07	MCF7
SPATA2L	16	89762764	89768121	40	0.484	1.11e-06	1.06e-07	MCF7
VPS9D1	16	89773540	89787394	89	0.00541	1.01e-06	1.06e-07	MCF7
ZNF276	16	89786807	89807332	89	0.00541	1.01e-06	1.06e-07	MCF7
TRNA_Ile	17	8090910	8090984	76	0.122	0	0.000134	MCF7
EIF4EBP3	18	139927250	139929163	4	1.91e-06	2.24e-05	3.6e-07	HIP
APBB3	18	139937852	139944189	4	1.91e-06	2.24e-05	3.6e-07	HIP
SLC35A4	18	139944419	139948683	4	1.91e-06	2.24e-05	3.6e-07	HIP
IK	18	140027383	140042065	4	1.91e-06	2.24e-05	3.6e-07	HIP
DND1	18	140050380	140053171	4	1.91e-06	2.24e-05	3.6e-07	HIP
ZMAT2	18	140080031	140086239	4	1.91e-06	2.24e-05	3.6e-07	HIP	www.ncbi.nlm.nih.gov/pubmed/28991256
PCDHA1	18	140165720	140391929	4	1.91e-06	2.24e-05	3.6e-07	HIP	www.ncbi.nlm.nih.gov/pubmed/26198764
TRNA_Ile	19	39902807	39902900	76	0.122	0	0.000186	MCF7
IRF3	19	50162825	50169132	7	0.000227	1.07e-06	2.19e-07	MCF7
BCL2L12	19	50168398	50177173	7	0.000227	1.07e-06	2.19e-07	MCF7

## Sheet: Supplementary Table 5
S5: The significant and novel genes identified by TWAS with the SCZ2 data												Back to Index
Gene	CHR	P0	P1	SPU(1)	SPU(2)	sig. SNP	Weight	Reported
MAP7D1	1	36621180	36646450	3.09461e-06	2.50316e-06	3.307e-07	YFS
MAP7D1	1	36621801	36646448	5.24575e-07	6.71603e-07	3.307e-07	NTR			Remark:
CNN3	1	95362507	95392834	0.0709851	7.39957e-08	9.386e-07	YFS			1. p-value cutoff: 0.05/10000 = 5E-5
HAX1	1	154244987	154248351	0.839479	3.20723e-06	5.128e-06	YFS	www.ncbi.nlm.nih.gov/pubmed/26198764		2. Reported column is based on the GWAS Catalog v1.0
ZBTB7B	1	154975105	154991001	0.0819428	2.96945e-07	3.178e-06	CMC	www.ncbi.nlm.nih.gov/pubmed/26198764
TMEM81	1	205052256	205053588	9.21503e-07	1.63912e-06	8.691e-07	CMC
TMEM81	1	205052258	205053645	0.000637592	2.9625e-06	8.691e-07	METSIM
CGREF1	2	27322220	27341995	6.68293e-06	2.09344e-06	3.318e-05	CMC
MRPL33	2	27994584	28210954	0.000976444	9.30221e-08	1.014e-07	YFS	www.ncbi.nlm.nih.gov/pubmed/26198764
SFXN5	2	73169165	73302747	0.00154414	1.20335e-06	8.424e-08	YFS
CCT7	2	73460548	73480149	4.37618e-06	9.4071e-06	8.424e-08	METSIM
ALMS1	2	73612885	73837046	1.74796e-05	7.15802e-07	8.424e-08	CMC	www.ncbi.nlm.nih.gov/pubmed/26198764
ALMS1	2	73612886	73837920	5.79632e-06	2.05909e-06	8.424e-08	YFS	www.ncbi.nlm.nih.gov/pubmed/26198764
NAT8	2	73867849	73869537	0.000129999	3.49676e-06	8.424e-08	CMC
SLC25A12	2	172640880	172864766	0.000268965	2.47667e-06	1.874e-06	METSIM
IGFBP2	2	217497551	217529159	0.000275996	2.15959e-06	1.267e-05	YFS
SLCO4C1	5	101569691	101632253	6.1346e-06	3.43351e-06	3.859e-07	CMC
CXXC5	5	139026884	139063467	0.00816578	2.89339e-06	1.512e-06	YFS
APBB3	5	139937853	139973337	6.79019e-06	1.80822e-06	3.596e-07	YFS
TMCO6	5	140019012	140024993	0.000107464	4.16974e-07	3.596e-07	YFS	www.ncbi.nlm.nih.gov/pubmed/28991256
NDUFA2	5	140024947	140027370	1.67802e-06	5.7934e-07	3.596e-07	CMC	www.ncbi.nlm.nih.gov/pubmed/28991256
IK	5	140026643	140042064	6.39471e-07	4.28463e-07	3.596e-07	YFS
DND1	5	140050379	140053171	3.60491e-06	1.13274e-06	3.596e-07	METSIM
ZMAT2	5	140080031	140086239	1.56863e-05	1.90429e-07	3.596e-07	CMC	www.ncbi.nlm.nih.gov/pubmed/28991256
PCDHA2	5	140174443	140391929	3.47509e-06	4.24408e-07	3.596e-07	CMC	www.ncbi.nlm.nih.gov/pubmed/28991256
PCDHA7	5	140213968	140391929	1.86182e-06	2.36431e-06	3.596e-07	CMC	www.ncbi.nlm.nih.gov/pubmed/28991256
PCDHA8	5	140220906	140391929	0.000107397	3.18725e-07	3.596e-07	CMC	www.ncbi.nlm.nih.gov/pubmed/28991256
PCDHAC1	5	140306301	140391929	7.59016e-05	3.88838e-07	3.596e-07	CMC
CUL9	6	43149913	43192325	0.308129	1.55027e-07	9.611e-07	YFS
LIN28B	6	105404922	105531207	2.51366e-05	2.26738e-06	3.6e-07	CMC	www.ncbi.nlm.nih.gov/pubmed/26198764
OGDH	7	44646171	44748665	0.276476	3.98946e-06	7.072e-07	METSIM
ABCB1	7	87133175	87342611	0.000545231	2.50687e-07	1.361e-07	YFS	www.ncbi.nlm.nih.gov/pubmed/26198764
SLC25A40	7	87462883	87505672	0.000295788	1.4373e-06	5.696e-07	METSIM
ERI1	8	8859692	8890848	0.00823517	1.24721e-06	4.971e-06	NTR	www.ncbi.nlm.nih.gov/pubmed/28991256
RP110A14.5	8	9046521	9060364	0.967854	1.34519e-06	4.491e-06	METSIM
MSRA	8	9952675	10286401	2.85312e-06	2.55868e-07	9.047e-08	NTR	www.ncbi.nlm.nih.gov/pubmed/21679298
ZDHHC2	8	17013538	17082308	5.01266e-06	7.31029e-08	1.136e-07	METSIM	www.ncbi.nlm.nih.gov/pubmed/26198764
STAR	8	38000217	38008600	9.7558e-05	1.10747e-07	2.324e-07	CMC
BAG4	8	38034051	38070819	2.48249e-05	4.82349e-07	2.324e-07	YFS	www.ncbi.nlm.nih.gov/pubmed/28991256
BAG4	8	38034105	38070819	1.97755e-05	1.2147e-06	2.324e-07	NTR	www.ncbi.nlm.nih.gov/pubmed/28991256
DDHD2	8	38089008	38120287	3.88406e-05	1.65936e-06	2.324e-07	CMC	www.ncbi.nlm.nih.gov/pubmed/28991256
FAM83H	8	144806103	144815971	0.161339	1.23291e-06	1.829e-07	METSIM
TEK	9	27109146	27230172	1.07479e-07	6.4037e-08	4.749e-07	CMC	www.ncbi.nlm.nih.gov/pubmed/26198764
PAX5	9	36833272	37034103	0.049919	1.53499e-07	4.089e-06	METSIM
PKN3	9	131464802	131483197	0.824437	2.16529e-08	1.924e-06	METSIM
TBC1D13	9	131549483	131572711	0.00106694	2.11974e-06	1.924e-06	METSIM
ENDOG	9	131580753	131584956	6.38528e-07	9.20218e-07	1.924e-06	YFS
CCBL1	9	131595221	131644773	9.10957e-06	1.50413e-07	1.924e-06	YFS	www.ncbi.nlm.nih.gov/pubmed/26198764
DOLPP1	9	131843379	131852717	0.000276075	6.69208e-07	1.924e-06	YFS
ADO	10	64564515	64568239	0.786495	1.96026e-06	1.61e-07	CMC
OBFC1	10	105637132	105678045	0.378928	3.14662e-06	3.452e-06	NTR
ZDHHC5	11	57435219	57468659	2.17206e-07	1.20842e-07	6.652e-08	YFS	www.ncbi.nlm.nih.gov/pubmed/25056061
COX8A	11	63742078	63744015	0.601734	7.34388e-07	1.312e-06	CMC
TMTC1	12	29653773	29937692	4.11476e-06	1.1665e-06	7.058e-08	METSIM	www.ncbi.nlm.nih.gov/pubmed/22885689
P2RX7	12	121570630	121624343	0.00601652	4.65427e-06	5.071e-06	NTR
CAMKK2	12	121675499	121736111	3.5501e-06	0.000308315	5.071e-06	NTR
WDR66	12	122355768	122441833	0.00769261	1.50537e-06	3.819e-06	METSIM
VPS33A	12	122692208	122751068	0.643377	2.13891e-06	3.819e-06	CMC
CLIP1	12	122755979	122907179	0.000187492	9.2294e-08	3.819e-06	METSIM	www.ncbi.nlm.nih.gov/pubmed/26198764
CLIP1	12	122755980	122891893	0.202019	2.8737e-07	3.819e-06	NTR	www.ncbi.nlm.nih.gov/pubmed/26198764
PPP2R3C	14	35554673	35591723	2.67876e-06	3.53039e-07	1.518e-07	YFS
PPP2R3C	14	35554678	35591519	2.74322e-07	3.18091e-07	1.518e-07	NTR
KIAA0391	14	35591052	35743271	6.64019e-07	2.9877e-07	1.518e-07	METSIM	www.ncbi.nlm.nih.gov/pubmed/26198764
RTN1	14	60062694	60337684	0.000178422	1.57077e-06	4.217e-07	METSIM	www.ncbi.nlm.nih.gov/pubmed/26198764
PCNX	14	71374122	71582099	3.78954e-06	1.77764e-07	1.592e-07	METSIM	www.ncbi.nlm.nih.gov/pubmed/26198764
CPEB1	15	83211950	83316728	0.000143558	1.12378e-06	5.524e-08	CMC	www.ncbi.nlm.nih.gov/pubmed/26198764
TFAP4	16	4307186	4323001	0.000281923	4.95001e-07	2.792e-07	CMC
CORO7	16	4404542	4466962	5.21377e-07	4.8425e-07	2.792e-07	CMC	www.ncbi.nlm.nih.gov/pubmed/28991256
NMRAL1	16	4511681	4545764	4.23376e-06	4.2157e-05	2.792e-07	METSIM	www.ncbi.nlm.nih.gov/pubmed/28991256
UBN1	16	4896666	4932361	0.175621	2.78304e-06	2.792e-07	METSIM
RPL13	16	89627064	89633237	0.000784082	1.62581e-07	1.061e-07	CMC
CPNE7	16	89642175	89663654	5.03473e-08	4.39426e-07	1.061e-07	CMC
CPNE7	16	89642176	89663654	0.521512	1.25092e-07	1.061e-07	METSIM
CHMP1A	16	89710838	89724193	0.0147073	9.06458e-08	1.061e-07	CMC
CHMP1A	16	89710839	89724253	0.543917	2.15507e-06	1.061e-07	YFS
SPIRE2	16	89884587	89937727	0.0013724	1.01108e-07	1.061e-07	YFS
ELAC2	17	12894928	12921381	2.89118e-06	6.15591e-06	2.839e-06	CMC	www.ncbi.nlm.nih.gov/pubmed/26198764
ELAC2	17	12895708	12921504	5.48785e-06	4.03123e-06	2.839e-06	METSIM	www.ncbi.nlm.nih.gov/pubmed/26198764
PRPSAP2	17	18743398	18834581	5.61741e-08	5.26281e-07	7.772e-07	YFS
CTD-2349P21.5	17	29056487	29058220	0.390947	3.55157e-06	1.12e-05	METSIM
TRIM37	17	57059999	57184266	3.03728e-06	1.27034e-05	1.449e-05	CMC
RPTOR	17	78518618	78940168	0.0215529	4.48647e-06	1.124e-06	NTR	www.ncbi.nlm.nih.gov/pubmed/26198764
PIAS2	18	44390917	44500130	1.94472e-06	9.23375e-06	1.591e-05	NTR
KCNG2	18	77623668	77660184	0.00447019	5.09704e-08	2.173e-07	METSIM	www.ncbi.nlm.nih.gov/pubmed/26198764
DOT1L	19	2164147	2232577	0.0173957	6.27197e-07	1.091e-06	CMC
SNRNP70	19	49588464	49611870	0.00207374	1.74134e-08	2.188e-07	CMC
PRR12	19	50094900	50129696	2.66064e-06	1.39746e-06	2.188e-07	METSIM	www.ncbi.nlm.nih.gov/pubmed/25056061
IRF3	19	50162825	50169132	0.0117643	3.17435e-06	2.188e-07	CMC
IRF3	19	50162826	50169132	4.70623e-06	3.03061e-06	2.188e-07	YFS
STAU1	20	47729875	47805288	0.180237	2.36943e-07	1.182e-07	CMC
TTLL1	22	43435522	43485434	2.53324e-06	4.93155e-06	4.79e-06	CMC	www.ncbi.nlm.nih.gov/pubmed/26198764
ZBED4	22	50247490	50282090	3.97828e-06	6.48018e-05	3.308e-07	YFS	www.ncbi.nlm.nih.gov/pubmed/26198764
ALG12	22	50296853	50312106	4.71615e-06	2.37978e-06	3.308e-07	CMC	www.ncbi.nlm.nih.gov/pubmed/26198764
CRELD2	22	50312282	50321186	4.15875e-06	3.93495e-06	3.308e-07	CMC

## Sheet: Supplementary Table 6
S6: The significant and novel genes identified by STD with the SCZ2 data												Back to Index
Gene	CHR	P0	P1	# SNPs	SPU(1)	SPU(2)	sig. SNP	Reported
ZMYM4	1	35734567	35887545	17	0.127686	1.24e-09	1.35e-05	www.ncbi.nlm.nih.gov/pubmed/26198764
AGO4	1	36273827	36323490	24	0.0418159	4.62e-07	3.31e-07	www.ncbi.nlm.nih.gov/pubmed/26198764		Remark:
AGO1	1	36335408	36389899	26	0.574765	2.06e-07	3.31e-07			1. p-value cutoff (Bonferroni correction): 2.2E-6
AGO3	1	36396318	36522063	56	0.000747844	6.03e-07	3.31e-07			2. Reported column is based on the GWAS Catalog v1.0
TEKT2	1	36549675	36553876	5	0.948588	6.27e-07	3.31e-07
GPR89C	1	145883867	147465755	2059	1.96e-06	0.000338823	0.0001615
PDZK1P1	1	145924387	147484331	2058	2.01e-06	0.000335338	0.0001615
RBBP5	1	205055269	205091150	58	0.0200429	1.87e-07	8.69e-07
DSTYK	1	205111630	205180727	113	1.38e-06	1.76e-06	8.69e-07
mir-29b-2	1	207974866	207996048	28	0.000581851	9.7e-07	1.61e-07
LOC148696	1	207991723	207995941	7	2.81e-07	1.16e-06	1.61e-07
RBKS	2	28004265	28113223	104	6.45e-05	6.88e-07	1.01e-07	www.ncbi.nlm.nih.gov/pubmed/26198764
BCL11A	2	60678301	60780633	112	0.00582184	4.4e-07	3.11e-07	www.ncbi.nlm.nih.gov/pubmed/26198764
EMX1	2	73144603	73162020	9	0.313738	1.5e-10	8.42e-08	www.ncbi.nlm.nih.gov/pubmed/26198764
SFXN5	2	73169164	73298965	148	0.0533928	9.73e-08	8.42e-08
LOC285033	2	96874153	96908362	21	0.00319192	7.62e-07	1.14e-05
AX747531	2	112249106	112258585	18	5.41e-12	5.49e-05	0.0005788
ZEB2	2	145141941	145277958	116	0.0189871	5.51e-07	1.29e-06	www.ncbi.nlm.nih.gov/pubmed/23974872
ERBB4	2	212240441	213403352	2802	0.0196833	1.43e-07	1.62e-05
FOXP1	3	71003864	71633140	869	0.00587862	1.15e-10	1.25e-07	www.ncbi.nlm.nih.gov/pubmed/26198764
BC040624	3	71338919	71355005	34	0.139819	1.45e-06	1.25e-07
UBE2D3	4	103717132	103790032	113	1.8e-06	9.11e-06	2.19e-06
AK093356	4	103749290	103765255	22	5.97e-07	6.87e-05	2.19e-06
SLC9B1	4	103806204	103940896	212	7.18e-07	9.13e-06	4.26e-06	www.ncbi.nlm.nih.gov/pubmed/28991256
EMB	5	49692030	49737234	63	0.00153983	1.67e-06	3.69e-07	www.ncbi.nlm.nih.gov/pubmed/26198764
MAN2A1	5	109025155	109203429	380	0.0965107	1.43e-06	1.03e-07	www.ncbi.nlm.nih.gov/pubmed/25056061
NDUFA2	5	140024947	140027370	7	1.57e-06	9.27e-07	3.6e-07	www.ncbi.nlm.nih.gov/pubmed/28991256
IK	5	140027383	140042065	19	5.9e-07	7.79e-07	3.6e-07
ADAMTS2	5	178537851	178772431	658	0.125333	1.41e-07	6.43e-05
DST	6	56322784	56819426	545	0.00792388	5.44e-07	3.5e-06	www.ncbi.nlm.nih.gov/pubmed/26198764
SLC16A10	6	111408780	111544606	159	1.68e-07	2.22e-06	1.37e-06
TRAF3IP2-AS1	6	111804674	111923497	166	0.000104331	1.09e-06	1.37e-06	www.ncbi.nlm.nih.gov/pubmed/26198764
INHBA	7	41728600	41742706	6	1.09e-06	6.45e-05	8.35e-07	www.ncbi.nlm.nih.gov/pubmed/26198764
DDX56	7	44605015	44614137	16	4.24e-08	9.35e-07	7.07e-07	www.ncbi.nlm.nih.gov/pubmed/26198764
ABCB1	7	87133178	87342639	201	0.0069302	7.53e-07	1.36e-07	www.ncbi.nlm.nih.gov/pubmed/26198764
FEZF1-AS1	7	121943711	121950131	9	0.00573024	1.83e-06	9.7e-08
MSRA	8	9911829	10286401	895	0.0030554	2.24e-08	9.05e-08	www.ncbi.nlm.nih.gov/pubmed/21679298
ZDHHC2	8	17013835	17080241	120	4.73e-05	2.4e-08	1.14e-07	www.ncbi.nlm.nih.gov/pubmed/26198764
CNOT7	8	17086739	17104387	31	0.109881	1.94e-06	1.14e-07
PSD3	8	18384812	18871196	1291	2.27e-06	9.12e-08	2.66e-07	www.ncbi.nlm.nih.gov/pubmed/26198764
CR936829	8	26227020	26228647	3	0.000659404	1.51e-06	2.27e-07
LETM2	8	38243958	38266062	20	0.378057	2.63e-09	2.32e-07	www.ncbi.nlm.nih.gov/pubmed/26198764
ZNF365	10	64018915	64431771	775	0.720863	8.03e-12	5.98e-08	www.ncbi.nlm.nih.gov/pubmed/26198764
DDX50	10	70661033	70706603	66	0.168837	1.94e-06	6.56e-06
KIAA1279	10	70748476	70776739	54	0.345929	1.91e-06	6.56e-06	www.ncbi.nlm.nih.gov/pubmed/26198764
CLP1	11	57425215	57429337	3	4.05e-07	0.00107978	6.65e-08	www.ncbi.nlm.nih.gov/pubmed/25056061
TMX2-CTNND1	11	57479994	57586652	84	0.0655449	2.01e-09	6.65e-08	www.ncbi.nlm.nih.gov/pubmed/25056061
BTBD18	11	57510985	57519253	2	0.103658	1.18e-07	6.65e-08	www.ncbi.nlm.nih.gov/pubmed/25056061
CTNND1	11	57520714	57586652	48	0.0655449	2.01e-09	6.65e-08	www.ncbi.nlm.nih.gov/pubmed/25056061
MARK2	11	63606399	63678492	75	0.0955425	2.13e-06	1.31e-06	www.ncbi.nlm.nih.gov/pubmed/26198764
OR10D3	11	124055974	124056912	7	5.33e-06	4e-07	1.01e-05
LEPREL2	12	6937571	6949018	33	1.01e-08	0.00379792	0.0006872
CLIP1	12	122755980	122907116	195	0.00389433	8.19e-07	3.82e-06	www.ncbi.nlm.nih.gov/pubmed/26198764
ZNF664	12	124457761	124499986	49	2.69e-05	1.68e-06	4.07e-07	www.ncbi.nlm.nih.gov/pubmed/26198764
ENOX1	13	43787665	44361116	942	7.58e-07	0.000263561	5.15e-06
NDFIP2	13	80055258	80130212	67	0.253161	9.42e-07	3.77e-06
RTN1	14	60062693	60337557	368	0.604688	2.17e-07	4.22e-07	www.ncbi.nlm.nih.gov/pubmed/26198764
PCNX	14	71374121	71582099	258	0.00119777	2.06e-07	1.59e-07	www.ncbi.nlm.nih.gov/pubmed/26198764
GTF2A1	14	81641795	81687575	50	0.00369589	2.06e-06	6.22e-06
LIPC	15	58702774	58861073	359	0.00020621	1.14e-06	5.19e-07	www.ncbi.nlm.nih.gov/pubmed/26198764
AX747251	15	58727099	58790934	156	5.14e-07	8.75e-06	5.19e-07
FAM63B	15	59063392	59149734	119	0.0315074	8.85e-07	5.19e-07	www.ncbi.nlm.nih.gov/pubmed/26198764
RAB8B	15	63481727	63559973	92	0.000224478	1.76e-06	4.09e-06	www.ncbi.nlm.nih.gov/pubmed/26198764
CPEB1	15	83211950	83316728	126	0.000582422	1.88e-09	5.52e-08	www.ncbi.nlm.nih.gov/pubmed/26198764
LOC283692	15	83316520	83361572	46	0.0414896	6.25e-08	5.52e-08
AP3B2	15	83328032	83378635	58	0.693671	1.18e-07	5.52e-08	www.ncbi.nlm.nih.gov/pubmed/28991256
DNAJA3	16	4475805	4506775	37	3e-06	3.5e-07	2.79e-07	www.ncbi.nlm.nih.gov/pubmed/26198764
NOMO1	16	14927642	14990014	20	0.000104326	6.5e-07	1.92e-05
SPG7	16	89574804	89624174	130	1.7e-06	3.46e-05	1.06e-07	www.ncbi.nlm.nih.gov/pubmed/26198764
CPNE7	16	89642175	89663654	79	0.000364447	3.76e-08	1.06e-07
EPN2	17	19140689	19240028	52	2.33e-08	2.28e-08	7.77e-07	www.ncbi.nlm.nih.gov/pubmed/26198764
EPN2-AS1	17	19199908	19209574	7	1.11e-05	1.76e-06	7.77e-07
B9D1	17	19240866	19281495	28	0.00011526	6.04e-08	7.77e-07
LGALS9B	17	20353175	20370848	20	2.16e-05	3.32e-10	1.05e-06
RHBDL3	17	30593194	30651680	116	0.01033	3.99e-07	3.27e-06	www.ncbi.nlm.nih.gov/pubmed/26198764
LOC51326	17	43623170	45099089	3371	0.0492965	8.27e-07	2.76e-05
LRRc37A	17	43627369	43664137	9	0.372499	1.11e-06	4.75e-05
AMZ2P1	17	62962667	62971703	5	0.0326897	2.2e-07	4.44e-05
RPTOR	17	78518624	78940173	1337	0.0776433	9.18e-07	1.12e-06	www.ncbi.nlm.nih.gov/pubmed/26198764
DYM	18	46570171	46987079	750	3.21e-05	1.85e-06	2.5e-06
DIRAS1	19	2714564	2721390	14	7.33e-05	1.49e-07	1.09e-06
PRRG2	19	50084586	50094265	17	5.35e-07	5.39e-09	2.19e-07	www.ncbi.nlm.nih.gov/pubmed/25056061
PRR12	19	50094911	50129696	34	1.74e-05	6.02e-07	2.19e-07	www.ncbi.nlm.nih.gov/pubmed/25056061
SCAF1	19	50145381	50161906	15	2.9e-05	1.48e-06	2.19e-07	www.ncbi.nlm.nih.gov/pubmed/25056061
IRF3	19	50162825	50169132	7	8.08e-05	3.04e-07	2.19e-07
BCL2L12	19	50168398	50177173	8	0.000370464	2.2e-06	2.19e-07
KCNB1	20	47988504	48100490	204	1.52e-05	1.59e-06	1.18e-07	www.ncbi.nlm.nih.gov/pubmed/25056061
PTGIS	20	48120410	48184707	70	0.293394	7.92e-07	1.18e-07	www.ncbi.nlm.nih.gov/pubmed/25056061
DOPEY2	21	37536838	37666572	365	0.00713448	1.39e-07	6.34e-06	www.ncbi.nlm.nih.gov/pubmed/26198764
BRD1	22	50166936	50221196	86	0.00166205	1.14e-07	3.31e-07	www.ncbi.nlm.nih.gov/pubmed/23894747
ALG12	22	50296853	50312106	52	0.00026887	5.2e-07	3.31e-07	www.ncbi.nlm.nih.gov/pubmed/26198764
PIM3	22	50354142	50357720	13	0.0182744	2e-08	3.31e-07

## Sheet: Supplementary Table 7
S7:﻿The numbers of the significant genes identified by analyzing the SCZ1 data												Back to Index
	Ehancer		Enhancer + Gene body			Remark:
	CP	GZ	CP	GZ		The numbers a;b;c in each cell indicate the numbers of
# Genes	1107	1165	1016	1062		(a) the significant genes;
SPU(1)	2;2;0	0;0;0	3;3;1	5;2;3		(b) the significant genes that covered one or more genome-wide significant SNPs within an extended gene region 500 Kbp in the SCZ1 data;
SPU(2)	7;3;4	19;7;5	9;4;6	20;10;8		(c) the significant genes that covered one or more genome-wide significant SNPs within an extended gene region 500 Kbp in the SCZ2 data.

## Sheet: Supplementary Table 8
﻿S8:The numbers of the significant genes identified by analyzing the SCZ2 data												Back to Index
	Ehancer		Enhancer + Gene body			Remark:
	CP	GZ	CP	GZ		The numbers a;b;c in each cell indicate the numbers of
# Genes	1099	1163	1013	1039		(a) the significant genes;
SPU(1)	8;3;3	25;5;5	14;4;6	14;5;7		(b) the significant genes that covered one or more genome-wide significant SNPs within an extended gene region 500 Kbp in the SCZ1 data;
SPU(2)	26;5;12	39;7;12	37;7;17	51;11;22		(c) the significant genes that covered one or more genome-wide significant SNPs within an extended gene region 500 Kbp in the SCZ2 data.

## Sheet: Supplementary Table 9
S9: The significant and novel genes identified by our new method applied to "enhancer + gene body" regions with CP or GZ information but no identified by ``E+G" or ``E" with MCF7 or Hippo information, TWAS, or STD in the SCZ2 data												Back to Index
Gene	CHR	P0	P1	# SNPs	SPU(1)	SPU(2)	sig. SNP	Source	Reported
PBXIP1	1	154916558	154928567	24	0.00121804	9.52653e-06	3.178e-06	CP
RILP	9	1549444	1553392	26	0.00386434	1.24833e-07	6.036e-08	GZ
SCARF1	9	1537151	1549083	34	0.00167913	2.52791e-07	6.036e-08	GZ				Remark:
TRIM16L	9	18625401	18639431	29	0.00347965	3.87374e-05	1.436e-06	GZ				1. Apply Bonferroni correction for each method
EPN2-IT1	9	19174705	19177701	6	1.2861e-05	1.49297e-06	7.772e-07	CP				2. Reported column is based on the GWAS Catalog v1.0
TRIM16L	9	18625401	18639431	31	0.00030315	1.90075e-06	1.436e-06	CP
HSBP1L1	10	77724581	77730822	64	0.00509635	2.24387e-05	2.173e-07	GZ
TXNL4A	10	77732866	77748532	64	5.69273e-05	2.46221e-05	2.173e-07	GZ
HSBP1L1	10	77724581	77730822	35	3.12697e-05	9.43492e-06	2.173e-07	CP
CGB1	11	49538825	49540191	37	0.000172537	2.96729e-05	3.922e-05	GZ
CGB2	11	49535129	49536495	37	4.51914e-05	2.39329e-05	3.922e-05	GZ
CGB5	11	49547101	49548568	33	5.95779e-05	1.46969e-05	3.922e-05	GZ
CGB7	11	49557530	49558997	50	0.000195084	3.69011e-05	3.922e-05	GZ
CGB8	11	49550894	49552368	36	5.57824e-05	1.57252e-05	3.922e-05	GZ
SLC7A10	11	33699569	33716756	55	0.228832	3.14018e-05	8.273e-08	GZ
SNAR-G1	11	49540276	49540404	34	0.00012341	2.06741e-05	3.922e-05	GZ
SNAR-G2	11	49534925	49535044	35	1.12006e-05	1.4397e-05	3.922e-05	GZ
C19orf25	11	1473199	1479228	52	0.186106	1.84471e-05	2.921e-05	CP
EMC10	11	50979733	50986783	25	3.05834e-06	1.86159e-05	9.064e-05	CP
KCNA7	11	49570674	49576198	34	7.07924e-06	0.00014446	5.652e-06	CP
NTF4	11	49564396	49567124	17	8.51686e-06	0.000143707	3.922e-05	CP
ARID5A	12	97202463	97218371	87	0.28518	9.85607e-07	7.364e-08	GZ
CNNM3	12	97481990	97501121	18	0.0965896	1.93749e-05	7.364e-08	GZ	www.ncbi.nlm.nih.gov/pubmed/26198764
CYP26B1	12	72356366	72374991	29	0.000349088	3.37768e-05	1.302e-07	GZ	www.ncbi.nlm.nih.gov/pubmed/25056061
AGBL5-AS1	12	27272550	27273132	25	0.000901867	2.48374e-05	3.318e-05	CP
NEURL3	12	97163379	97173846	84	0.00185968	2.7684e-05	7.364e-08	CP
SLC30A3	12	27477439	27485960	28	0.0884122	7.92052e-06	9.321e-07	CP
NKX2-2	13	21491659	21494664	157	0.200171	1.55612e-05	1.647e-05	GZ
KIAA1656	15	30764799	30773894	38	0.467722	4.7022e-05	9.396e-05	GZ
PLA2G3	15	31530792	31536593	38	0.300638	1.65176e-05	1.455e-05	GZ
CTBP1-AS	17	1203907	1212379	32	0.971672	2.11704e-05	0.0001137	CP
VTRNA1	18	140090860	140090958	8	0.000165009	3.08199e-06	3.596e-07	GZ
VTRNA1-2	18	140098510	140098598	6	0.00481619	8.75864e-06	3.596e-07	GZ
SLC22A7	19	43265997	43273276	43	0.00012567	4.41641e-05	9.611e-07	GZ
SLC35B2	19	44221837	44225627	18	3.89008e-05	6.8179e-05	3.341e-05	GZ
CRIP3	19	43273210	43276530	68	5.52646e-05	1.11596e-05	9.611e-07	CP
SLC22A7	19	43265997	43273276	77	4.55028e-05	1.68853e-05	9.611e-07	CP
NPY	20	24323806	24331484	87	0.00702988	5.61034e-06	3.59e-07	GZ
NPY	20	24323806	24331484	100	0.0388366	5.35558e-07	3.59e-07	CP
MAPK15	21	144798506	144804633	66	0.157513	6.34745e-06	1.829e-07	GZ
MIR4660	21	8905954	8906028	408	2.27059e-06	3.24715e-08	4.971e-06	GZ
PPP1R3B	21	8993763	9009152	79	1.70362e-06	1.14385e-08	4.971e-06	GZ
FAM83H-AS1	21	144816309	144828507	93	0.0764222	4.80956e-05	1.829e-07	CP	www.ncbi.nlm.nih.gov/pubmed/26198764
MAPK15	21	144798506	144804633	30	0.000414215	7.71665e-06	1.829e-07	CP
MIR4660	21	8905954	8906028	457	9.49638e-06	5.83204e-07	4.971e-06	CP
PPP1R3B	21	8993763	9009152	97	0.0118335	1.24115e-05	4.971e-06	CP
RHPN1	21	144451024	144466390	827	2.99048e-05	4.14458e-05	1.829e-07	CP
