# Supplementary material
Source: publisher figshare collection journal article supplement (https://gsajournals.figshare.com/articles/dataset/_/6193055)
Supplement: Supplementary file 1 [file 1]

# Supplementary of “Integration of enhancer-promoter interactions with GWAS summary results identifies novel schizophrenia-associated genes and pathways”

Chong Wu<sup>1</sup> and Wei Pan<sup>1\*</sup>

<sup>1</sup> Division of Biostatistics, University of Minnesota;

April 26, 2018

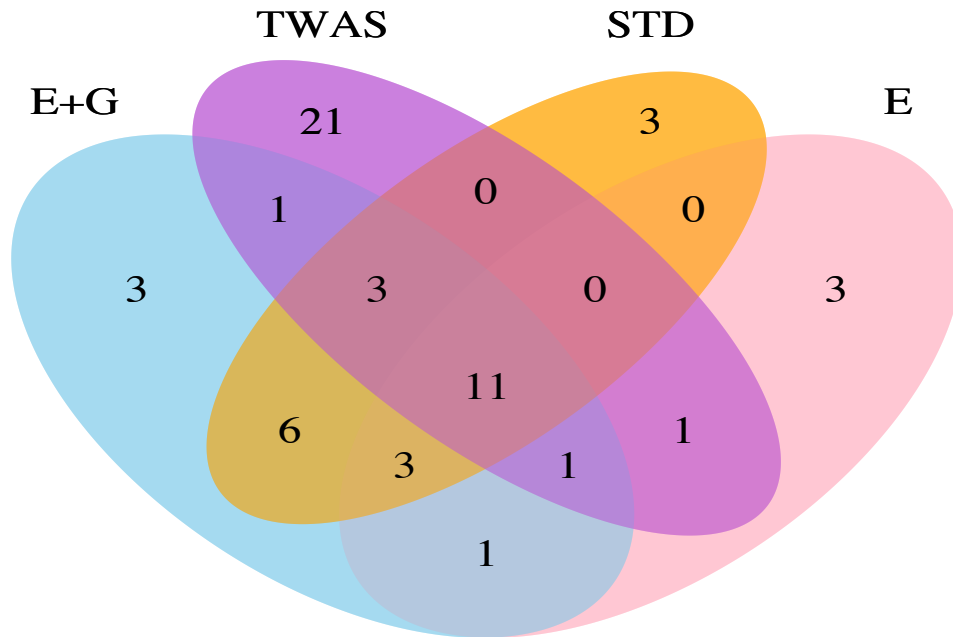

Figure 1: Venn diagram of the significant genes identified by the different methods applied to the 5,203 common genes in the SCZ1 data . “E+G” and “E” combine the results (take the union) of MCF7 and Hippo, while TWAS combine the results of YFS, NTR, METSIM, and CMC-based weights.

---

\*Correspondence: [weip@biostat.umn.edu](mailto:weip@biostat.umn.edu) (W.P.)

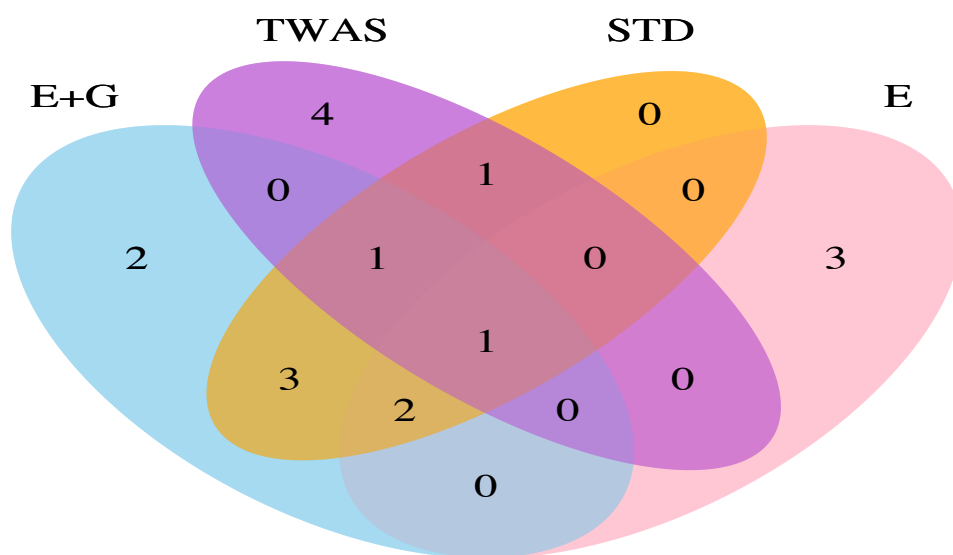

Figure 2: Venn diagram of the significant and novel genes identified by the different methods applied to the 2226 common genes in the SCZ1 data . “E+G” and “E” stand for the results of MCF7 data, while TWAS stands for the results of CMC-based weights.
